# Supplementary material
Source: MDPI journal article supplement (https://www.mdpi.com/2076-3298/10/2/22)
Supplement: s1 [file s1]

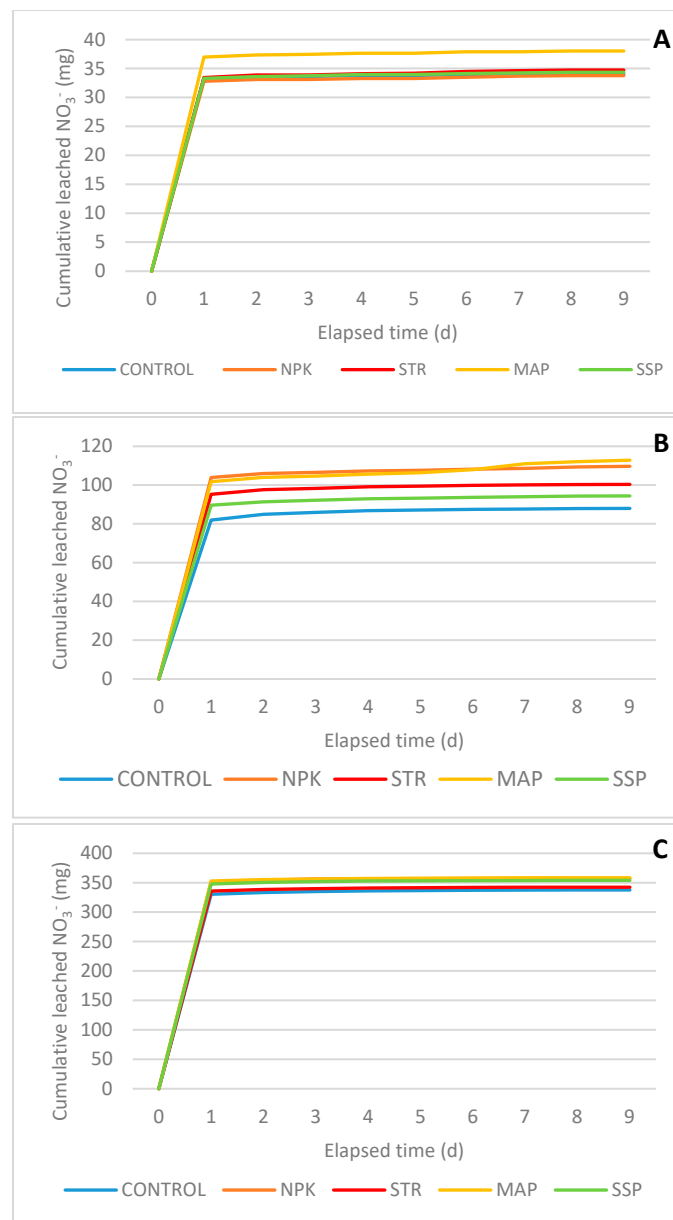

Figure S1. Amount of  $\text{NO}_3^-$  leached from alkaline (A), neutral (B) and acidic (C) soil columns as a function of time in struvite and P-fertilizers.

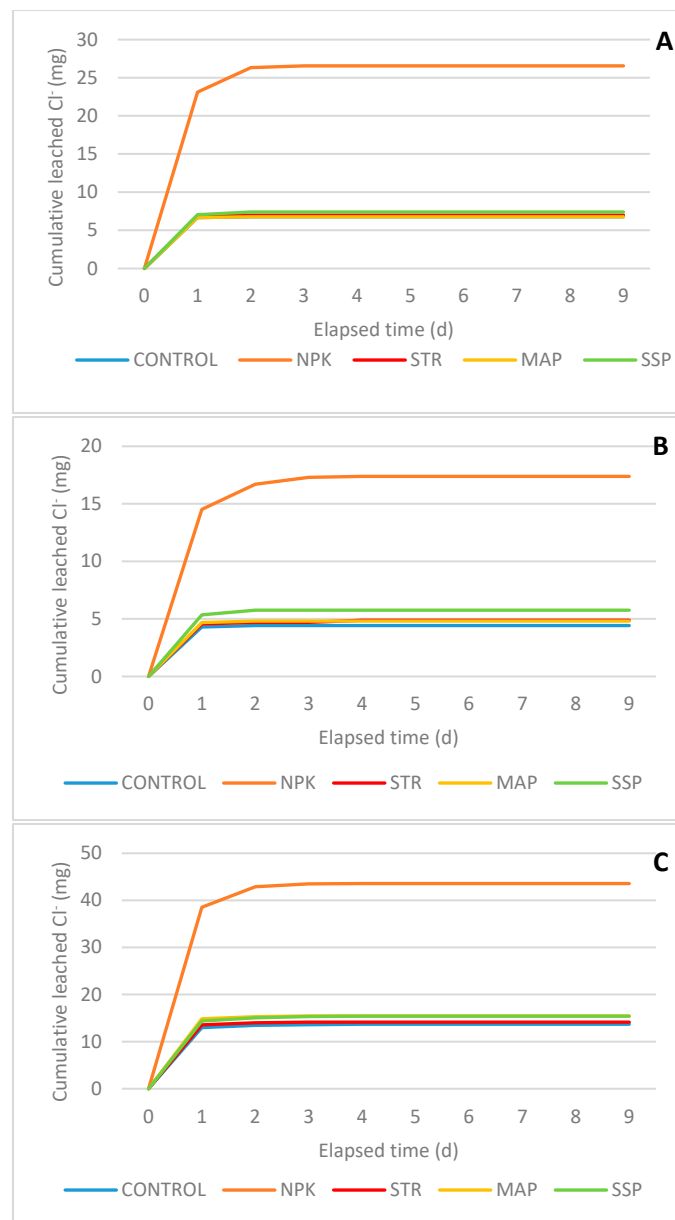

Figure S2. Amount of  $\text{Cl}^-$  leached from alkaline (A), neutral (B) and acidic (C) soil columns as a function of time in struvite and P-fertilizers.

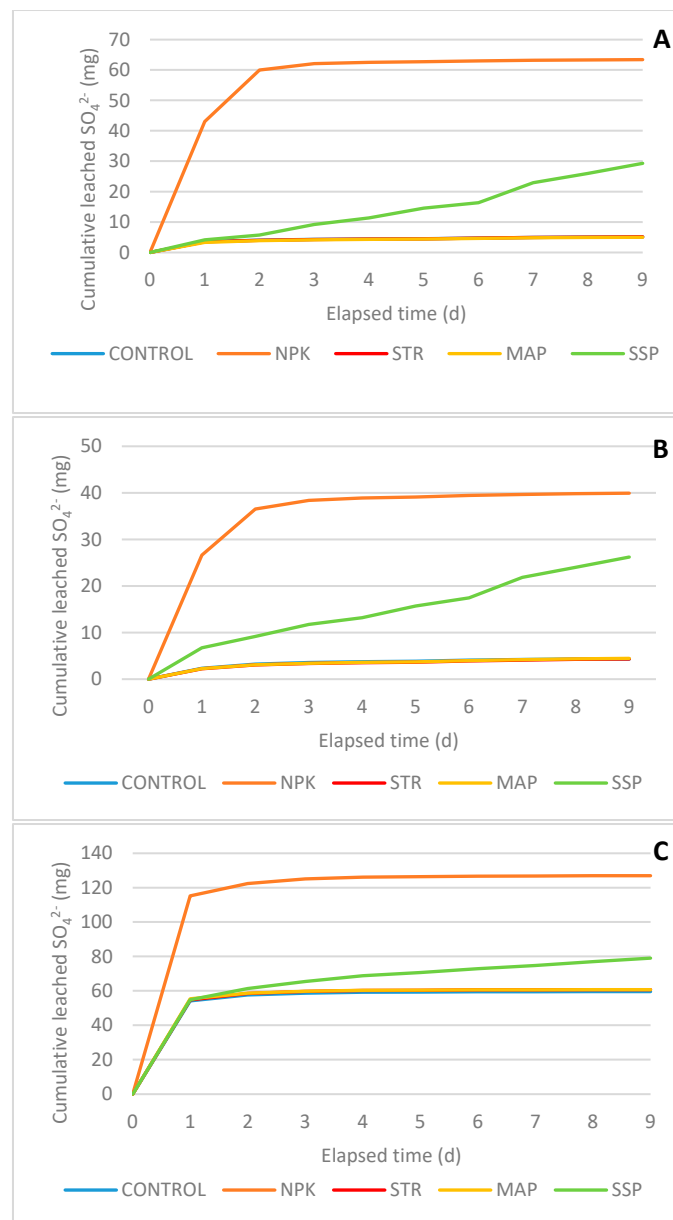

Figure S3. Amount of  $\text{SO}_4^{2-}$  leached from alkaline (A), neutral (B) and acidic (C) soil columns as a function of time in struvite and P-fertilizers.
